# Supplementary material for: Folate Insufficiency Due to MTHFR Deficiency Is Bypassed by 5-Methyltetrahydrofolate
Source: J Clin Med. 2020 Sep 2;9(9):2836. doi: 10.3390/jcm9092836 (PMC7564482; doi:10.3390/jcm9092836)
Supplement: Supplementary file 1 [file jcm-09-02836-s001.pdf]

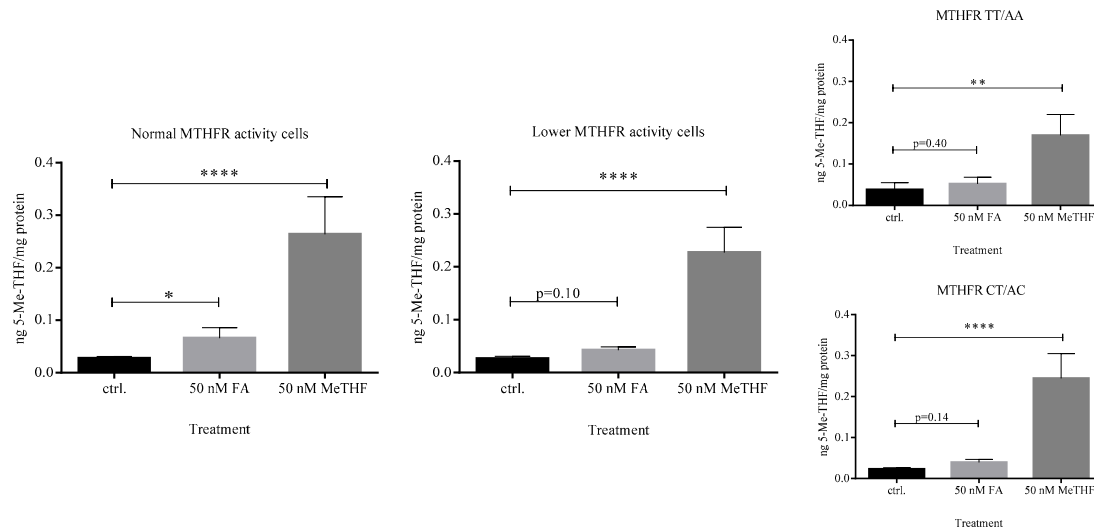

**Supplementary Figure 1: Intracellular 5-Me-THF concentrations in (A) NORMAL MTHFR activity cells (genotype 677CC/1298AA, 677CT/1298AA, 677CC/1298AC, and 677CC/1298CC) (N=12) and in (B) LOW MTHFR activity cells (genotype 677TT/1298AA and 677CT/1298AC) (N=15). (B.1) LCLs with 677TT/1298AA genotype (N=5) and (B.2) LCLs with 677CT/1298AC genotype (N=10). Statistical differences were determined by one-way ANOVA with post-hoc Tukey's multiple comparisons test. Values are means  $\pm$  SD. \*  $p \leq 0.05$ , \*\*  $p \leq 0.01$ , \*\*\*\*  $p \leq 0.0001$ , compared to untreated control (ctrl.).**

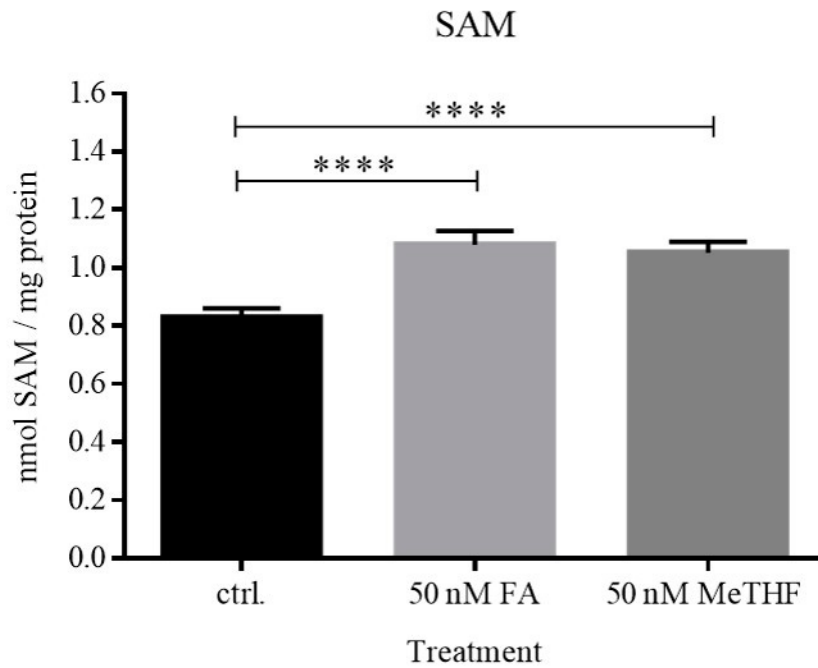

| Intracellular concentration of SAM<br>[ngmol SAM / mg protein] |                         |                               |
|----------------------------------------------------------------|-------------------------|-------------------------------|
| Ctrl.<br>(mean ± SD)                                           | 50 nM FA<br>(mean ± SD) | 50 nM 5-Me-THF<br>(mean ± SD) |
| 0.829 ± 0.180                                                  | 1.080 ± 0.263           | 1.052 ± 0.213                 |

**Supplementary Figure 2: Intracellular SAM concentration in folate-depleted cells (ctrl.) and after FA or 5-Me-THF treatment in LCLs.** LCLs (N=35) were treated with equimolar concentration of folate supplements for 72h, then they were lysed and the concentration of SAM was measured with HPLC-UV/vis. Statistical differences were determined by one-way ANOVA with post-hoc Tukey's multiple comparisons test. Values are means ± SD. \*\*\*\*  $p \leq 0.0001$ , compared to control.

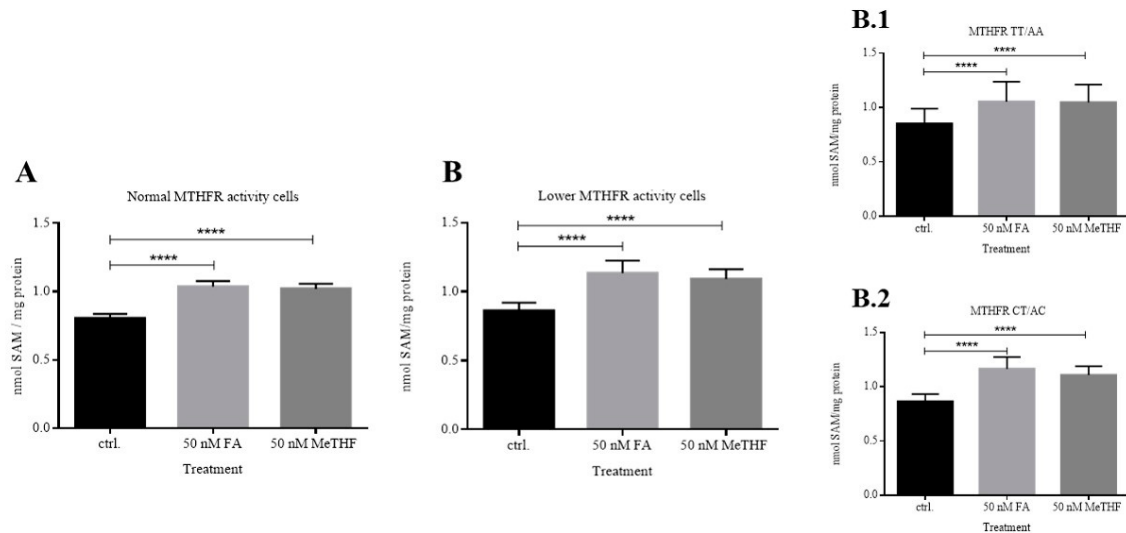

**Supplementary Figure 3: Intracellular SAM concentrations in (A) NORMAL MTHFR activity cells (genotype 677CC/1298AA, 677CT/1298AA, 677CC/1298AC, and 677CC/1298CC) (N=12) and in (B) LOW MTHFR activity cells (genotype 677TT/1298AA and 677CT/1298AC) (N=15). (B.1) LCLs with 677TT/1298AA genotype (N=5) and (B.2) LCLs with 677CT/1298AC genotype (N=10).** Statistical differences were determined by one-way ANOVA with post-hoc Tukey's multiple comparisons test. Values are means  $\pm$  SD. \*\*\*\*  $p \leq 0.0001$ , compared to untreated control (ctrl.).

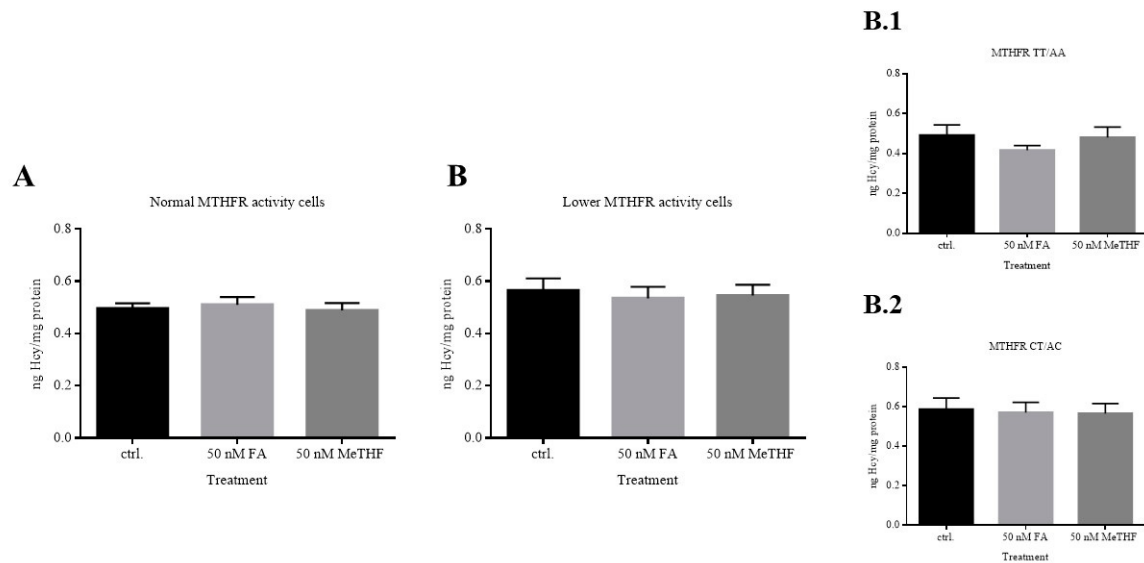

**Supplementary Figure 4: Intracellular Hcy concentrations in (A) NORMAL MTHFR activity cells (genotype 677CC/1298AA, 677CT/1298AA, 677CC/1298AC, and 677CC/1298CC) (N=12) and in (B) LOW MTHFR activity cells (genotype 677TT/1298AA and 677CT/1298AC) (N=15). (B.1) LCLs with 677TT/1298AA genotype (N=5) and (B.2) LCLs with 677CT/1298AC genotype (N=10).** Statistical differences were determined by one-way ANOVA with post-hoc Tukey's multiple comparisons test. Values are means  $\pm$  SD. There were no statistical significant changes on intracellular Hcy after the addition of folate supplements, compared to untreated control (ctrl.).

**Supplementary Table 1: Genotype of the ten common polymorphisms of genes involved in folate uptake and metabolism in LCL cells.**

| ID<br>(LCL) | Gene (polymorphism)   |                         |                         |                           |                                        |                                         |                         |                         |                          |                           |
|-------------|-----------------------|-------------------------|-------------------------|---------------------------|----------------------------------------|-----------------------------------------|-------------------------|-------------------------|--------------------------|---------------------------|
|             | SLC19A1<br>(rs105266) | FPGS<br>(rs1544<br>105) | DHFR<br>(rs16776<br>93) | MTHFD1<br>(rs2236225<br>) | MTHFR<br><b>677</b><br>(rs1801133<br>) | MTHFR<br><b>1298</b><br>(rs1801131<br>) | MTRR<br>(rs18013<br>94) | BHMT<br>(rs37338<br>90) | GNMT<br>(rs10948<br>059) | DNMT3B<br>(rs2424913<br>) |
| <b>1112</b> | GA                    | CT                      | CC                      | AA                        | TT                                     | AA                                      | AG                      | GG                      | CT                       | CC                        |
| <b>1122</b> | GA                    | CC                      | CA                      | GG                        | CC                                     | AC                                      | AG                      | GG                      | TT                       | CC                        |
| <b>1515</b> | GA                    | CT                      | CA                      | GA                        | CT                                     | AC                                      | AG                      | GA                      | TT                       | TT                        |
| <b>1516</b> | GG                    | TT                      | CA                      | AA                        | TT                                     | AA                                      | GG                      | GG                      | CC                       | CT                        |
| <b>1570</b> | AA                    | CT                      | CA                      | GG                        | CC                                     | AC                                      | AA                      | GA                      | CT                       | TT                        |
| <b>1728</b> | GA                    | CC                      | CC                      | GA                        | CT                                     | AC                                      | AA                      | GA                      | TT                       | CC                        |
| <b>1754</b> | AA                    | CC                      | CC                      | AA                        | CT                                     | AA                                      | AG                      | GG                      | CT                       | CT                        |
| <b>1801</b> | /                     | CC                      | CC                      | AA                        | CC                                     | AA                                      | AA                      | AA                      | CT                       | CC                        |
| <b>1823</b> | GG                    | CT                      | CC                      | GA                        | CT                                     | AC                                      | AG                      | GA                      | CC                       | CC                        |
| <b>1976</b> | GG                    | CT                      | CC                      | GG                        | CT                                     | AC                                      | AG                      | GG                      | CC                       | CT                        |
| <b>4973</b> | AA                    | CT                      | CC                      | GA                        | CT                                     | AA                                      | AG                      | GG                      | CC                       | CT                        |
| <b>4995</b> | AA                    | CT                      | CC                      | GG                        | CT                                     | AA                                      | AA                      | GG                      | CC                       | CT                        |
| <b>5876</b> | GG                    | CT                      | CC                      | AA                        | CT                                     | AC                                      | AA                      | GG                      | CT                       | TT                        |
| <b>6037</b> | GA                    | CC                      | CC                      | AA                        | CT                                     | AA                                      | AG                      | GG                      | TT                       | TT                        |
| <b>6127</b> | GA                    | CC                      | CA                      | GA                        | CT                                     | AC                                      | GG                      | GA                      | CC                       | CC                        |
| <b>6153</b> | GA                    | CC                      | CC                      | GA                        | CT                                     | AC                                      | AG                      | GA                      | CC                       | CC                        |
| <b>6159</b> | GG                    | CC                      | CC                      | AA                        | TT                                     | AA                                      | AG                      | GG                      | CC                       | CT                        |
| <b>6203</b> | GA                    | CT                      | CC                      | AA                        | CT                                     | AA                                      | AG                      | GG                      | CC                       | CT                        |
| <b>6333</b> | GA                    | CT                      | CC                      | AA                        | CT                                     | AC                                      | AG                      | GG                      | CT                       | CC                        |
| <b>6417</b> | GA                    | CT                      | CC                      | GG                        | CT                                     | AA                                      | AG                      | GG                      | CC                       | CC                        |
| <b>6423</b> | GG                    | CC                      | CA                      | AA                        | TT                                     | AA                                      | AA                      | GG                      | CT                       | CC                        |
| <b>6425</b> | AA                    | CT                      | AA                      | GA                        | TT                                     | AA                                      | GG                      | GG                      | CT                       | TT                        |
| <b>6429</b> | GG                    | CT                      | CC                      | GA                        | CT                                     | AC                                      | GG                      | GG                      | CC                       | TT                        |
| <b>6430</b> | GA                    | TT                      | CA                      | GA                        | CT                                     | AC                                      | GG                      | GA                      | CT                       | CC                        |
| <b>380</b>  | AA                    | CC                      | CC                      | AA                        | CC                                     | AA                                      | AG                      | GG                      | CT                       | TT                        |
| <b>381</b>  | AA                    | CT                      | CC                      | GA                        | CC                                     | AA                                      | AG                      | GA                      | TT                       | TT                        |
| <b>382</b>  | GA                    | TT                      | CC                      | AA                        | CT                                     | AA                                      | AG                      | GA                      | CC                       | CC                        |
| <b>383</b>  | GA                    | TT                      | CA                      | AA                        | CT                                     | AC                                      | GG                      | GG                      | CT                       | CT                        |
| <b>384</b>  | GA                    | CT                      | CC                      | AA                        | CC                                     | AC                                      | AG                      | GG                      | CC                       | TT                        |
| <b>385</b>  | GA                    | CT                      | AA                      | AA                        | CC                                     | AA                                      | AG                      | GG                      | CT                       | CT                        |
| <b>386</b>  | GG                    | CT                      | CC                      | GG                        | CT                                     | AA                                      | AG                      | GG                      | CT                       | CT                        |
| <b>387</b>  | GA                    | CC                      | CC                      | GG                        | CT                                     | AA                                      | AG                      | GG                      | CT                       | CT                        |
| <b>388</b>  | GA                    | CT                      | CA                      | GA                        | CC                                     | CC                                      | AG                      | GA                      | CT                       | TT                        |
| <b>389</b>  | GG                    | CT                      | CA                      | GA                        | CC                                     | AA                                      | AA                      | GG                      | CT                       | CT                        |
| <b>390</b>  | GG                    | CT                      | CC                      | AA                        | CC                                     | AC                                      | GG                      | GG                      | CT                       | CT                        |
